# Supplementary material
Source: MDPI journal article supplement (https://www.mdpi.com/2073-4441/11/2/249)
Supplement: s2 [file s2]

## SludgeTec extended dataset framework - 0 - CONTEXT DATA

Total data items 50

### DATASET 0.1 - CONTEXT DATA - WWTP Boundary

| Category    | ID      | Data item                                 | Item description                                                                                                                                                 |
|-------------|---------|-------------------------------------------|------------------------------------------------------------------------------------------------------------------------------------------------------------------|
|             | 0.01... | (indicator)                               |                                                                                                                                                                  |
| GEOGRAPHY A | A0.001  | Lat                                       | Location of the WWTP - Latitude                                                                                                                                  |
|             | A0.002  | Long                                      | Location of the WWTP - Long                                                                                                                                      |
|             | A0.003  | Map                                       | Cartography at the adequate scale to understand the location of the plant in relation to near-by human settlements, water resources and other relevant features. |
|             | A0.004  | Elevation above sea level                 |                                                                                                                                                                  |
|             | A0.005  | Is the plant inside or outside the city ? |                                                                                                                                                                  |
|             | A0.006  | Land uses in 1 km radius                  |                                                                                                                                                                  |
|             | A0.007  | Distance to nearest house                 |                                                                                                                                                                  |

### DATASET 0.2 - CONTEXT DATA - Municipal Boundary

| Category               | ID      | Data item                                                                       | Item description                                                                                                                                                       |
|------------------------|---------|---------------------------------------------------------------------------------|------------------------------------------------------------------------------------------------------------------------------------------------------------------------|
|                        | 0.02... | (indicator)                                                                     |                                                                                                                                                                        |
| GEOGRAPHY A            | A0.001  | Spatial definition (maps)                                                       | Cartography at the adequate scale to understand the location of the plant in relation to near-by human settlements, water resources and other relevant features.       |
|                        | A0.002  | Surface                                                                         | Total surface of municipality                                                                                                                                          |
|                        | A0.003  | Weather type                                                                    |                                                                                                                                                                        |
|                        | A0.004  | Dry season months                                                               | During which months is it the dry season?                                                                                                                              |
|                        | A0.005  | Rainy season months                                                             | During which months is it the rainy season?                                                                                                                            |
|                        | A0.006  | Average yearly precipitation                                                    |                                                                                                                                                                        |
|                        | A0.007  | Average precipitation during dry season                                         |                                                                                                                                                                        |
|                        | A0.008  | Average precipitation during rainy season                                       |                                                                                                                                                                        |
|                        | A0.009  | Average highest temperature                                                     |                                                                                                                                                                        |
|                        | A0.010  | Average lowest temperature                                                      |                                                                                                                                                                        |
| POPULATION B           | B0.001  | Total population                                                                | Total population in the municipality. When possible and relevant, include floating population and their temporal behaviour (e.g. tourism, yearly massive events, etc.) |
|                        | B0.002  | Percentage rural population                                                     | How urban / rural is this municipality?                                                                                                                                |
|                        | B0.003  | Unemployment rate                                                               |                                                                                                                                                                        |
|                        | B0.004  | Percentage of people living on or below the poverty line                        | Specify poverty line threshold in the notes section                                                                                                                    |
|                        | B0.005  | Percentage of people with a different mother tongue than the country's official |                                                                                                                                                                        |
|                        | B0.006  | Percentage indigenous population                                                |                                                                                                                                                                        |
| LAND USE AND ECONOMY C | C0.001  | Predominant Land uses                                                           | Major land uses in the municipality, describe to the best degree of detail possible, e.g. crop type and farming methods.                                               |
|                        | C0.002  | GDP percentage of different economic activities                                 |                                                                                                                                                                        |

### DATASET 0.3 - CONTEXT DATA - Subcatchment Boundary

| Category               | ID      | Data item                                      | Item description                                                                                                                                                            |
|------------------------|---------|------------------------------------------------|-----------------------------------------------------------------------------------------------------------------------------------------------------------------------------|
|                        | 0.02... | (indicator)                                    |                                                                                                                                                                             |
| GEOGRAPHY A            | A0.001  | Spatial definition (maps)                      | Cartography at the adequate scale to understand the location of the plant in relation to near-by human settlements, water resources and other relevant features.            |
|                        | A0.002  | Total subcatchment surface                     |                                                                                                                                                                             |
|                        | A0.003  | Altitude at main source                        | Altitude above sea level at the source or spring of the main river course                                                                                                   |
|                        | A0.004  | Altitude at discharge point                    | Altitude above sea level at river mouth                                                                                                                                     |
|                        | A0.005  | Length of main river course                    |                                                                                                                                                                             |
|                        | A0.006  | Discharges to                                  | Waterbody or place water body discharges to                                                                                                                                 |
|                        | A0.007  | Main soil types                                |                                                                                                                                                                             |
|                        | A0.008  | Main substrate type                            |                                                                                                                                                                             |
|                        | A0.009  | Conservation status, general ecological status | Overall ecological status of the area (conserved, endangered, etc.).                                                                                                        |
| POPULATION B           | B0.001  | Total population                               | Total population in the subcatchment area. When possible and relevant, include floating population and their temporal behaviour (e.g. tourism, yearly massive events, etc.) |
|                        | B0.002  | Percentage rural population                    |                                                                                                                                                                             |
| LAND USE AND ECONOMY C | C0.001  | Predominant Land uses upstream from WWTP       |                                                                                                                                                                             |
|                        | C0.002  | Predominant Land uses downstream from WWTP     |                                                                                                                                                                             |

### DATASET 0.4 - CONTEXT DATA - Watershed Boundary

| Category               | ID      | Data item                                      | Item description                                                                                                                                                 |
|------------------------|---------|------------------------------------------------|------------------------------------------------------------------------------------------------------------------------------------------------------------------|
|                        | 0.04... | (indicator)                                    |                                                                                                                                                                  |
| GEOGRAPHY A            | A0.001  | Spatial definition (maps)                      | Cartography at the adequate scale to understand the location of the plant in relation to near-by human settlements, water resources and other relevant features. |
|                        | A0.002  | Total watershed surface                        | Total catchment area in watershed                                                                                                                                |
|                        | A0.003  | Endo/exorheic                                  | Open or closed basin                                                                                                                                             |
|                        | A0.004  | Discharges to                                  | If exorheic, body of water and/or basin where the watershed discharges into                                                                                      |
|                        | A0.005  | Yearly discharge regime                        |                                                                                                                                                                  |
|                        | A0.006  | Main soil types                                |                                                                                                                                                                  |
|                        | A0.007  | Main substrate type                            |                                                                                                                                                                  |
|                        | A0.008  | Level of exploitation of water resources       |                                                                                                                                                                  |
|                        | A0.009  | Conservation status, general ecological status | Overall ecological status of the area (conserved, endangered, etc.).                                                                                             |
| POPULATION B           | B0.001  | Total population                               |                                                                                                                                                                  |
|                        | B0.002  | Percentage rural population                    | How urban / rural is this watershed?                                                                                                                             |
| LAND USE AND ECONOMY C | B0.003  | Predominant Land uses                          |                                                                                                                                                                  |

SludgeTec extended dataset framework - I - TECHNICAL-ENVIRONMENTAL DATA

Total data items 380

DATASET I.01 - TECHNICAL-ENVIRONMENTAL BASELINE - WWTP Scale

data items 211

| Category                                        | ID      | Data item                                 | Item description                                                                                                                                                                                                                                           |
|-------------------------------------------------|---------|-------------------------------------------|------------------------------------------------------------------------------------------------------------------------------------------------------------------------------------------------------------------------------------------------------------|
|                                                 | I.01... |                                           |                                                                                                                                                                                                                                                            |
| GENERAL A                                       | A0.001  | Technology used                           | Technical procedure with which the plan treats waste water. Note any relevant particularities. If needed, include a diagram of the process in an annex.                                                                                                    |
|                                                 | A0.002  | Construction year                         | Year of construction. When construction lasted more than one year, state ending year.                                                                                                                                                                      |
|                                                 | A0.003  | Surface occupied                          | Surface occupied by the plant.                                                                                                                                                                                                                             |
|                                                 | A0.004  | Land reserves                             | Amount of land that the plant has already acquired to grow or expand                                                                                                                                                                                       |
|                                                 | A0.005  | Number of people served                   |                                                                                                                                                                                                                                                            |
| INPUTS B                                        | B0.001  | Design inflow                             | Flow capacity that the plant was originally designed for.                                                                                                                                                                                                  |
|                                                 | B0.002  | Volume waste water input                  | Total volume of water entering the plant in the reporting year                                                                                                                                                                                             |
| Inflow B0                                       | B0.003  | Average inflow (AF)                       | Average flow (in a year) of wastewater into WWTP.                                                                                                                                                                                                          |
|                                                 | B0.004  | Average inflow (AFr) rainy season         | Average flow (during the rainy season) of wastewater coming into WWTP. At best choose a reporting year that describe average seasonal conditions, i.e. not extraordinarily dry or wet years. Specify the duration of the season (in between what months?). |
|                                                 | B0.005  | Average plant capacity utilization        | Percent of design capacity being used, on average, during the reporting year                                                                                                                                                                               |
|                                                 | B0.006  | Volumetric Efficiency                     | Total treated water / total wastewater incoming (100)                                                                                                                                                                                                      |
|                                                 | B0.007  | Average inflow (AFd) dry season           | Average flow (during the dry season) of wastewater coming into WWTP. The best data will describe average season conditions, i.e. not extraordinarily dry or wet years. Specify the duration of the season (between what months).                           |
|                                                 | B0.008  | Peak inflow                               | Maximum flow of wastewater coming into WWTP at peak times. Specify hour of day and duration of peak period.                                                                                                                                                |
|                                                 | B0.009  | Rain Proportion of AF during rainy season | Proportion of rain water entering the WWTP during the rainy season. If calculations are performed, include in an annex.                                                                                                                                    |
|                                                 | B0.010  | Wastewater fractions                      | Identify the proportions of different types of waste water entering the plant (agricultural runoff, industry, domestic, etc.)                                                                                                                              |
|                                                 | B1.001  | Temperature                               |                                                                                                                                                                                                                                                            |
|                                                 | B1.002  | BOD                                       |                                                                                                                                                                                                                                                            |
| Inflow quality parameters B1                    | B1.003  | COD                                       |                                                                                                                                                                                                                                                            |
|                                                 | B1.004  | Total Nitrogen                            |                                                                                                                                                                                                                                                            |
|                                                 | B1.005  | Ammonium                                  |                                                                                                                                                                                                                                                            |
| Inflow Nutrients                                | B1.006  | Nitrates                                  |                                                                                                                                                                                                                                                            |
|                                                 | B1.007  | Nitrites                                  |                                                                                                                                                                                                                                                            |
|                                                 | B1.008  | Total Phosphorus                          |                                                                                                                                                                                                                                                            |
|                                                 | B1.009  | K                                         |                                                                                                                                                                                                                                                            |
|                                                 | B1.010  | Ca                                        |                                                                                                                                                                                                                                                            |
|                                                 | B1.011  | Mg                                        |                                                                                                                                                                                                                                                            |
|                                                 | B1.012  | Na                                        |                                                                                                                                                                                                                                                            |
|                                                 | B1.013  | SAR                                       |                                                                                                                                                                                                                                                            |
| Salts inflow                                    | B1.014  | Electric conductivity                     |                                                                                                                                                                                                                                                            |
|                                                 | B1.015  | Faecal coliforms                          |                                                                                                                                                                                                                                                            |
|                                                 | B1.016  | E.Coli                                    |                                                                                                                                                                                                                                                            |
|                                                 | B1.017  | Helminths                                 |                                                                                                                                                                                                                                                            |
|                                                 | B1.018  | Dissolved organic Carbon (DOC)            |                                                                                                                                                                                                                                                            |
|                                                 | B1.019  | Organic Matter                            |                                                                                                                                                                                                                                                            |
|                                                 | B1.020  | Organic acids                             |                                                                                                                                                                                                                                                            |
|                                                 | B1.021  | TSS                                       | Total Suspended Solids                                                                                                                                                                                                                                     |
|                                                 | B1.022  | Turbidity                                 |                                                                                                                                                                                                                                                            |
|                                                 | B1.023  | pH                                        |                                                                                                                                                                                                                                                            |
| Metals, metalloids and trace elements in inflow | B1.024  | Al                                        |                                                                                                                                                                                                                                                            |
|                                                 | B1.025  | As                                        |                                                                                                                                                                                                                                                            |
|                                                 | B1.026  | Cd                                        |                                                                                                                                                                                                                                                            |
|                                                 | B1.027  | Co                                        |                                                                                                                                                                                                                                                            |
|                                                 | B1.028  | Cr                                        |                                                                                                                                                                                                                                                            |
|                                                 | B1.029  | Cu                                        |                                                                                                                                                                                                                                                            |
|                                                 | B1.030  | Fe                                        |                                                                                                                                                                                                                                                            |
|                                                 | B1.031  | Mn                                        |                                                                                                                                                                                                                                                            |
|                                                 | B1.032  | Ni                                        |                                                                                                                                                                                                                                                            |
|                                                 | B1.033  | Ti                                        |                                                                                                                                                                                                                                                            |
|                                                 | B1.034  | Zn                                        |                                                                                                                                                                                                                                                            |
|                                                 | B1.035  | Hg                                        |                                                                                                                                                                                                                                                            |
|                                                 | B1.036  | Pb                                        |                                                                                                                                                                                                                                                            |
|                                                 | B1.037  | Se                                        |                                                                                                                                                                                                                                                            |
|                                                 | B1.038  | B                                         |                                                                                                                                                                                                                                                            |
|                                                 | B1.039  | Mo                                        |                                                                                                                                                                                                                                                            |
|                                                 | B1.040  | Residual chlorine                         |                                                                                                                                                                                                                                                            |
| Others                                          | B1.041  | Grease and oils                           |                                                                                                                                                                                                                                                            |
|                                                 | B1.042  | Floating matter                           |                                                                                                                                                                                                                                                            |
|                                                 | B1.043  | Color                                     |                                                                                                                                                                                                                                                            |
|                                                 | B1.044  | Microplastics                             |                                                                                                                                                                                                                                                            |
|                                                 | B1.045  | AOX                                       |                                                                                                                                                                                                                                                            |
|                                                 | B1.046  | B(a)P                                     |                                                                                                                                                                                                                                                            |
|                                                 | B1.047  | PCB                                       |                                                                                                                                                                                                                                                            |
|                                                 | B1.048  | PCDD                                      |                                                                                                                                                                                                                                                            |
|                                                 | B1.049  | PCDF                                      |                                                                                                                                                                                                                                                            |
|                                                 | B1.050  | PFC                                       |                                                                                                                                                                                                                                                            |
|                                                 | B1.051  | dI-PCB                                    |                                                                                                                                                                                                                                                            |

|                                                  |        |                                     |                                                                                                                                                                                                                                                                                                                                                                                                                                                                                                                                                                                                                                                                                                                                                                                                                                                                                                                                                                                                                                                                                                                            |
|--------------------------------------------------|--------|-------------------------------------|----------------------------------------------------------------------------------------------------------------------------------------------------------------------------------------------------------------------------------------------------------------------------------------------------------------------------------------------------------------------------------------------------------------------------------------------------------------------------------------------------------------------------------------------------------------------------------------------------------------------------------------------------------------------------------------------------------------------------------------------------------------------------------------------------------------------------------------------------------------------------------------------------------------------------------------------------------------------------------------------------------------------------------------------------------------------------------------------------------------------------|
|                                                  |        |                                     | <p>This is a backup data item, used to register data on inflow quality that is vague or qualitative, in case no quantitative data is available for physico-chemical parameters. For instance, if it is known that a textile industry is connected to the sewage system, but no precise wastewater quality information is available, this data item can register the likely existence of compounds in the waste water (in textile dye industries e.g.: benzenes, copper, lead, amines), giving thus a general guidance as to what can be expected in terms of treatment needs.</p> <p>Raw materials are all inputs necessary for the plant to function (e.g. machine oils, fuel, chemicals for the flocculation phase or other stages of the process, etc.), as well as office supplies. Should be given in tonnes per year when possible. When data available is in other units, make sure to note so in the units column. This data can be used for material flow analysis.</p> <p>Useful for footprinting</p> <p>Energy consumed in the reporting year, all energy carriers together and all energy uses considered.</p> |
|                                                  | B1.052 | Possible main compounds in AF       |                                                                                                                                                                                                                                                                                                                                                                                                                                                                                                                                                                                                                                                                                                                                                                                                                                                                                                                                                                                                                                                                                                                            |
| Other Inputs B2                                  | B2.001 | Raw materials used                  |                                                                                                                                                                                                                                                                                                                                                                                                                                                                                                                                                                                                                                                                                                                                                                                                                                                                                                                                                                                                                                                                                                                            |
|                                                  | B2.002 | Raw materials sources               |                                                                                                                                                                                                                                                                                                                                                                                                                                                                                                                                                                                                                                                                                                                                                                                                                                                                                                                                                                                                                                                                                                                            |
|                                                  | B2.003 | Total energy consumed               |                                                                                                                                                                                                                                                                                                                                                                                                                                                                                                                                                                                                                                                                                                                                                                                                                                                                                                                                                                                                                                                                                                                            |
|                                                  | B2.004 | Energy/m3 treated water             |                                                                                                                                                                                                                                                                                                                                                                                                                                                                                                                                                                                                                                                                                                                                                                                                                                                                                                                                                                                                                                                                                                                            |
| Energy matrix and uses                           | B2.005 | Energy matrix                       | Total J consumed per type of energy source (carrier) e.g. natural gas, solar, electricity, etc.                                                                                                                                                                                                                                                                                                                                                                                                                                                                                                                                                                                                                                                                                                                                                                                                                                                                                                                                                                                                                            |
| Energy uses                                      | B2.006 | Energy uses per activity            | Specify consumption of different activities (e.g. pumping, lighting) in J. Add as many categories as identifiable.                                                                                                                                                                                                                                                                                                                                                                                                                                                                                                                                                                                                                                                                                                                                                                                                                                                                                                                                                                                                         |
| OUTPUTS C                                        | C0.001 | Total volume Treated Water produced | Total Outflow of waste water from the plant, in yearly total average.                                                                                                                                                                                                                                                                                                                                                                                                                                                                                                                                                                                                                                                                                                                                                                                                                                                                                                                                                                                                                                                      |
|                                                  | C0.002 | Average yearly outflow              | Average outflow of treated water out of WWTP. The best data will describe average season conditions, i.e. not extraordinarily dry or wet years.                                                                                                                                                                                                                                                                                                                                                                                                                                                                                                                                                                                                                                                                                                                                                                                                                                                                                                                                                                            |
| WW Outflow C0                                    | C0.003 | Average outflow (AF) rainy season   | Average outflow (during the rainy season) of wastewater out of WWTP. Specify the duration of the season in the context dataset                                                                                                                                                                                                                                                                                                                                                                                                                                                                                                                                                                                                                                                                                                                                                                                                                                                                                                                                                                                             |
| Quality parameters - outflow C1                  | C0.004 | Average outflow (AF) dry season     |                                                                                                                                                                                                                                                                                                                                                                                                                                                                                                                                                                                                                                                                                                                                                                                                                                                                                                                                                                                                                                                                                                                            |
|                                                  | C0.005 | Discharge point                     | Where does the WWTP discharge to?                                                                                                                                                                                                                                                                                                                                                                                                                                                                                                                                                                                                                                                                                                                                                                                                                                                                                                                                                                                                                                                                                          |
|                                                  | C0.006 | Bypass discharge point              |                                                                                                                                                                                                                                                                                                                                                                                                                                                                                                                                                                                                                                                                                                                                                                                                                                                                                                                                                                                                                                                                                                                            |
|                                                  | C1.001 | Temperature                         |                                                                                                                                                                                                                                                                                                                                                                                                                                                                                                                                                                                                                                                                                                                                                                                                                                                                                                                                                                                                                                                                                                                            |
|                                                  | C1.002 | BOD                                 |                                                                                                                                                                                                                                                                                                                                                                                                                                                                                                                                                                                                                                                                                                                                                                                                                                                                                                                                                                                                                                                                                                                            |
|                                                  | C1.003 | COD                                 |                                                                                                                                                                                                                                                                                                                                                                                                                                                                                                                                                                                                                                                                                                                                                                                                                                                                                                                                                                                                                                                                                                                            |
|                                                  | C1.004 | Total Nitrogen                      |                                                                                                                                                                                                                                                                                                                                                                                                                                                                                                                                                                                                                                                                                                                                                                                                                                                                                                                                                                                                                                                                                                                            |
| Nutrients in outflow                             | C1.005 | Ammonium                            |                                                                                                                                                                                                                                                                                                                                                                                                                                                                                                                                                                                                                                                                                                                                                                                                                                                                                                                                                                                                                                                                                                                            |
|                                                  | C1.006 | Nitrates                            |                                                                                                                                                                                                                                                                                                                                                                                                                                                                                                                                                                                                                                                                                                                                                                                                                                                                                                                                                                                                                                                                                                                            |
|                                                  | C1.007 | Nitrites                            |                                                                                                                                                                                                                                                                                                                                                                                                                                                                                                                                                                                                                                                                                                                                                                                                                                                                                                                                                                                                                                                                                                                            |
|                                                  | C1.008 | Total Phosphorus                    |                                                                                                                                                                                                                                                                                                                                                                                                                                                                                                                                                                                                                                                                                                                                                                                                                                                                                                                                                                                                                                                                                                                            |
| Salts in outflow                                 | C1.009 | K                                   |                                                                                                                                                                                                                                                                                                                                                                                                                                                                                                                                                                                                                                                                                                                                                                                                                                                                                                                                                                                                                                                                                                                            |
|                                                  | C1.010 | Ca                                  |                                                                                                                                                                                                                                                                                                                                                                                                                                                                                                                                                                                                                                                                                                                                                                                                                                                                                                                                                                                                                                                                                                                            |
|                                                  | C1.011 | Mg                                  |                                                                                                                                                                                                                                                                                                                                                                                                                                                                                                                                                                                                                                                                                                                                                                                                                                                                                                                                                                                                                                                                                                                            |
|                                                  | C1.012 | Na                                  |                                                                                                                                                                                                                                                                                                                                                                                                                                                                                                                                                                                                                                                                                                                                                                                                                                                                                                                                                                                                                                                                                                                            |
|                                                  | C1.013 | SAR                                 | Can be used when measurements for salinity/SAR (Na, Ca Mg) are not available, as general indicator for salinity.                                                                                                                                                                                                                                                                                                                                                                                                                                                                                                                                                                                                                                                                                                                                                                                                                                                                                                                                                                                                           |
|                                                  | C1.014 | Electric conductivity               |                                                                                                                                                                                                                                                                                                                                                                                                                                                                                                                                                                                                                                                                                                                                                                                                                                                                                                                                                                                                                                                                                                                            |
| Pathogens in outflow                             | C1.015 | Faecal coliforms                    |                                                                                                                                                                                                                                                                                                                                                                                                                                                                                                                                                                                                                                                                                                                                                                                                                                                                                                                                                                                                                                                                                                                            |
|                                                  | C1.016 | E.Coli                              |                                                                                                                                                                                                                                                                                                                                                                                                                                                                                                                                                                                                                                                                                                                                                                                                                                                                                                                                                                                                                                                                                                                            |
|                                                  | C1.017 | Helminths                           |                                                                                                                                                                                                                                                                                                                                                                                                                                                                                                                                                                                                                                                                                                                                                                                                                                                                                                                                                                                                                                                                                                                            |
| Organics in outflow                              | C1.018 | Dissolved organic Carbon (DOC)      |                                                                                                                                                                                                                                                                                                                                                                                                                                                                                                                                                                                                                                                                                                                                                                                                                                                                                                                                                                                                                                                                                                                            |
|                                                  | C1.019 | Organic Matter                      |                                                                                                                                                                                                                                                                                                                                                                                                                                                                                                                                                                                                                                                                                                                                                                                                                                                                                                                                                                                                                                                                                                                            |
|                                                  | C1.020 | Organic acids                       |                                                                                                                                                                                                                                                                                                                                                                                                                                                                                                                                                                                                                                                                                                                                                                                                                                                                                                                                                                                                                                                                                                                            |
|                                                  | C1.021 | Sedimentable solids                 |                                                                                                                                                                                                                                                                                                                                                                                                                                                                                                                                                                                                                                                                                                                                                                                                                                                                                                                                                                                                                                                                                                                            |
|                                                  | C1.022 | TSS                                 |                                                                                                                                                                                                                                                                                                                                                                                                                                                                                                                                                                                                                                                                                                                                                                                                                                                                                                                                                                                                                                                                                                                            |
|                                                  | C1.023 | Turbidity                           |                                                                                                                                                                                                                                                                                                                                                                                                                                                                                                                                                                                                                                                                                                                                                                                                                                                                                                                                                                                                                                                                                                                            |
|                                                  | C1.024 | pH                                  |                                                                                                                                                                                                                                                                                                                                                                                                                                                                                                                                                                                                                                                                                                                                                                                                                                                                                                                                                                                                                                                                                                                            |
| Metals, metalloids and trace elements in outflow | C1.025 | Al                                  |                                                                                                                                                                                                                                                                                                                                                                                                                                                                                                                                                                                                                                                                                                                                                                                                                                                                                                                                                                                                                                                                                                                            |
|                                                  | C1.026 | As                                  |                                                                                                                                                                                                                                                                                                                                                                                                                                                                                                                                                                                                                                                                                                                                                                                                                                                                                                                                                                                                                                                                                                                            |
|                                                  | C1.027 | Cd                                  |                                                                                                                                                                                                                                                                                                                                                                                                                                                                                                                                                                                                                                                                                                                                                                                                                                                                                                                                                                                                                                                                                                                            |
|                                                  | C1.028 | Cyanide (CN)                        |                                                                                                                                                                                                                                                                                                                                                                                                                                                                                                                                                                                                                                                                                                                                                                                                                                                                                                                                                                                                                                                                                                                            |
|                                                  | C1.029 | Co                                  |                                                                                                                                                                                                                                                                                                                                                                                                                                                                                                                                                                                                                                                                                                                                                                                                                                                                                                                                                                                                                                                                                                                            |
|                                                  | C1.030 | Cr                                  |                                                                                                                                                                                                                                                                                                                                                                                                                                                                                                                                                                                                                                                                                                                                                                                                                                                                                                                                                                                                                                                                                                                            |
|                                                  | C1.031 | Cu                                  |                                                                                                                                                                                                                                                                                                                                                                                                                                                                                                                                                                                                                                                                                                                                                                                                                                                                                                                                                                                                                                                                                                                            |
|                                                  | C1.032 | Fe                                  |                                                                                                                                                                                                                                                                                                                                                                                                                                                                                                                                                                                                                                                                                                                                                                                                                                                                                                                                                                                                                                                                                                                            |
|                                                  | C1.033 | Mn                                  |                                                                                                                                                                                                                                                                                                                                                                                                                                                                                                                                                                                                                                                                                                                                                                                                                                                                                                                                                                                                                                                                                                                            |
|                                                  | C1.034 | Ni                                  |                                                                                                                                                                                                                                                                                                                                                                                                                                                                                                                                                                                                                                                                                                                                                                                                                                                                                                                                                                                                                                                                                                                            |
|                                                  | C1.035 | Ti                                  |                                                                                                                                                                                                                                                                                                                                                                                                                                                                                                                                                                                                                                                                                                                                                                                                                                                                                                                                                                                                                                                                                                                            |
|                                                  | C1.036 | Zn                                  |                                                                                                                                                                                                                                                                                                                                                                                                                                                                                                                                                                                                                                                                                                                                                                                                                                                                                                                                                                                                                                                                                                                            |
|                                                  | C1.037 | Hg                                  |                                                                                                                                                                                                                                                                                                                                                                                                                                                                                                                                                                                                                                                                                                                                                                                                                                                                                                                                                                                                                                                                                                                            |
|                                                  | C1.038 | Pb                                  |                                                                                                                                                                                                                                                                                                                                                                                                                                                                                                                                                                                                                                                                                                                                                                                                                                                                                                                                                                                                                                                                                                                            |
|                                                  | C1.039 | Se                                  |                                                                                                                                                                                                                                                                                                                                                                                                                                                                                                                                                                                                                                                                                                                                                                                                                                                                                                                                                                                                                                                                                                                            |
|                                                  | C1.040 | B                                   |                                                                                                                                                                                                                                                                                                                                                                                                                                                                                                                                                                                                                                                                                                                                                                                                                                                                                                                                                                                                                                                                                                                            |
|                                                  | C1.041 | Mo                                  |                                                                                                                                                                                                                                                                                                                                                                                                                                                                                                                                                                                                                                                                                                                                                                                                                                                                                                                                                                                                                                                                                                                            |
| Others in outflow                                | C1.042 | Residual chlorine                   |                                                                                                                                                                                                                                                                                                                                                                                                                                                                                                                                                                                                                                                                                                                                                                                                                                                                                                                                                                                                                                                                                                                            |
|                                                  | C1.043 | Grease and oils                     |                                                                                                                                                                                                                                                                                                                                                                                                                                                                                                                                                                                                                                                                                                                                                                                                                                                                                                                                                                                                                                                                                                                            |
|                                                  | C1.044 | Floating matter                     |                                                                                                                                                                                                                                                                                                                                                                                                                                                                                                                                                                                                                                                                                                                                                                                                                                                                                                                                                                                                                                                                                                                            |
|                                                  | C1.045 | Color                               |                                                                                                                                                                                                                                                                                                                                                                                                                                                                                                                                                                                                                                                                                                                                                                                                                                                                                                                                                                                                                                                                                                                            |
|                                                  | C1.046 | Microplastics                       | Visible microplastics. Microplastics are defined as no greater than 5 mm plastics and/or synthetic fibre strands.                                                                                                                                                                                                                                                                                                                                                                                                                                                                                                                                                                                                                                                                                                                                                                                                                                                                                                                                                                                                          |
| Organic pollutants in outflow                    | C1.047 | AOX                                 |                                                                                                                                                                                                                                                                                                                                                                                                                                                                                                                                                                                                                                                                                                                                                                                                                                                                                                                                                                                                                                                                                                                            |
|                                                  | C1.048 | B(a)P                               |                                                                                                                                                                                                                                                                                                                                                                                                                                                                                                                                                                                                                                                                                                                                                                                                                                                                                                                                                                                                                                                                                                                            |
|                                                  | C1.049 | PCB                                 |                                                                                                                                                                                                                                                                                                                                                                                                                                                                                                                                                                                                                                                                                                                                                                                                                                                                                                                                                                                                                                                                                                                            |
|                                                  | C1.050 | PCDD                                |                                                                                                                                                                                                                                                                                                                                                                                                                                                                                                                                                                                                                                                                                                                                                                                                                                                                                                                                                                                                                                                                                                                            |
|                                                  | C1.051 | PCDF                                |                                                                                                                                                                                                                                                                                                                                                                                                                                                                                                                                                                                                                                                                                                                                                                                                                                                                                                                                                                                                                                                                                                                            |
|                                                  | C1.052 | PFC                                 |                                                                                                                                                                                                                                                                                                                                                                                                                                                                                                                                                                                                                                                                                                                                                                                                                                                                                                                                                                                                                                                                                                                            |
|                                                  | C1.053 | dI-PCB                              |                                                                                                                                                                                                                                                                                                                                                                                                                                                                                                                                                                                                                                                                                                                                                                                                                                                                                                                                                                                                                                                                                                                            |

|                                                  |        |                                                                                           |                                                                                                                                                                                                                                                                        |
|--------------------------------------------------|--------|-------------------------------------------------------------------------------------------|------------------------------------------------------------------------------------------------------------------------------------------------------------------------------------------------------------------------------------------------------------------------|
| Wastewater Reuse C2                              | C2.001 | Percentage of wastewater output being recycled or reused                                  |                                                                                                                                                                                                                                                                        |
| Sludge C3                                        | C3.001 | Total Sludge produced yearly                                                              | Total amount of sludge produced in the reporting year                                                                                                                                                                                                                  |
| Sludge Quality parameters                        | C3.002 | Al                                                                                        |                                                                                                                                                                                                                                                                        |
| Metals, mewtalloids and trace elements in sludge | C3.003 | As                                                                                        |                                                                                                                                                                                                                                                                        |
|                                                  | C3.004 | Cd                                                                                        |                                                                                                                                                                                                                                                                        |
|                                                  | C3.005 | Co                                                                                        |                                                                                                                                                                                                                                                                        |
|                                                  | C3.006 | Cr                                                                                        |                                                                                                                                                                                                                                                                        |
|                                                  | C3.007 | Cu                                                                                        |                                                                                                                                                                                                                                                                        |
|                                                  | C3.008 | Fe                                                                                        |                                                                                                                                                                                                                                                                        |
|                                                  | C3.009 | Mn                                                                                        |                                                                                                                                                                                                                                                                        |
|                                                  | C3.010 | Ni                                                                                        |                                                                                                                                                                                                                                                                        |
|                                                  | C3.011 | Ti                                                                                        |                                                                                                                                                                                                                                                                        |
|                                                  | C3.012 | Zn                                                                                        |                                                                                                                                                                                                                                                                        |
|                                                  | C3.013 | Hg                                                                                        |                                                                                                                                                                                                                                                                        |
|                                                  | C3.014 | Pb                                                                                        |                                                                                                                                                                                                                                                                        |
|                                                  | C3.015 | Se                                                                                        |                                                                                                                                                                                                                                                                        |
|                                                  | C3.016 | B                                                                                         |                                                                                                                                                                                                                                                                        |
|                                                  | C3.017 | Mo                                                                                        |                                                                                                                                                                                                                                                                        |
| Nutrients in sludge                              | C3.018 | Total Nitrogen                                                                            |                                                                                                                                                                                                                                                                        |
|                                                  | C3.019 | Ammonium                                                                                  |                                                                                                                                                                                                                                                                        |
|                                                  | C3.020 | Nitrates                                                                                  |                                                                                                                                                                                                                                                                        |
|                                                  | C3.021 | Nitrites                                                                                  |                                                                                                                                                                                                                                                                        |
|                                                  | C3.022 | Phosphorus                                                                                |                                                                                                                                                                                                                                                                        |
|                                                  | C3.023 | Electric conductivity                                                                     |                                                                                                                                                                                                                                                                        |
|                                                  | C3.024 | K                                                                                         |                                                                                                                                                                                                                                                                        |
| Salts in sludge                                  | C3.025 | Ca                                                                                        |                                                                                                                                                                                                                                                                        |
|                                                  | C3.026 | Mg                                                                                        |                                                                                                                                                                                                                                                                        |
|                                                  | C3.027 | Na                                                                                        |                                                                                                                                                                                                                                                                        |
|                                                  | C3.028 | SAR                                                                                       |                                                                                                                                                                                                                                                                        |
|                                                  | C3.029 | Moisture content                                                                          |                                                                                                                                                                                                                                                                        |
| Pathogens in sludge                              | C3.030 | Calorific value                                                                           |                                                                                                                                                                                                                                                                        |
|                                                  | C3.031 | Helminths                                                                                 |                                                                                                                                                                                                                                                                        |
|                                                  | C3.032 | Total coliforms                                                                           |                                                                                                                                                                                                                                                                        |
|                                                  | C3.033 | E.Coli                                                                                    |                                                                                                                                                                                                                                                                        |
|                                                  | C3.034 | Salmonella                                                                                |                                                                                                                                                                                                                                                                        |
| Organics                                         | C3.035 | Organic Matter                                                                            |                                                                                                                                                                                                                                                                        |
|                                                  | C3.036 | Organic acids                                                                             |                                                                                                                                                                                                                                                                        |
|                                                  | C3.037 | pH                                                                                        |                                                                                                                                                                                                                                                                        |
|                                                  | C3.038 | Microplastics                                                                             |                                                                                                                                                                                                                                                                        |
|                                                  | C3.039 | AOX                                                                                       | Visible microplastics. Microplastics are defined as no grater than 5 mm plastic pieces and/or synthetic fibre strands.                                                                                                                                                 |
| Organic pollutants                               | C3.040 | B(a)P                                                                                     |                                                                                                                                                                                                                                                                        |
|                                                  | C3.041 | PCB                                                                                       |                                                                                                                                                                                                                                                                        |
|                                                  | C3.042 | PCDD                                                                                      |                                                                                                                                                                                                                                                                        |
|                                                  | C3.043 | PCDF                                                                                      |                                                                                                                                                                                                                                                                        |
|                                                  | C3.044 | PFC                                                                                       |                                                                                                                                                                                                                                                                        |
|                                                  | C3.045 | dI-PCB                                                                                    |                                                                                                                                                                                                                                                                        |
| sludge use C4                                    | C4.001 | Scope of sludge management                                                                | % of sludge that is managed, including treatment in different ways, such as use in agriculture, thermal disposal, landfills, etc. As proposed by Popovic & Kraslawski (2018)                                                                                           |
|                                                  | C4.002 | Current use/management of sludge                                                          | What is done with sludge once it is dried at the plant?                                                                                                                                                                                                                |
|                                                  | C4.003 | Which sludge management improvement options have been identified in the past and by whom? |                                                                                                                                                                                                                                                                        |
|                                                  | C4.004 | Potential sludge users                                                                    | Who?                                                                                                                                                                                                                                                                   |
| Emissions C5                                     | C5.001 | Total Biogas production                                                                   | How much biogas was produced in the reporting year?                                                                                                                                                                                                                    |
| Biogas                                           | C5.002 | Current use/management of biogas                                                          | How is biogas currently managed?                                                                                                                                                                                                                                       |
|                                                  | C5.003 | Which improved biogas management options been identified and by whom?                     | Yes/No. What options have been proposed in the past?                                                                                                                                                                                                                   |
|                                                  | C5.004 | Potential biogas users?                                                                   | Who?                                                                                                                                                                                                                                                                   |
|                                                  | C5.005 | GHG emissions                                                                             | Can be divided into GHG emissions linked to plant operation and maintenance, and emissions produced by the wastewater itself. Specify and disclose method for calculations performed in an annex. The online tool ECAM (wacclim.org/ecam) is an option for estimation. |
| GHG Emissions                                    | C5.006 | Are there complaints regarding odours?                                                    | E.g. neighbours                                                                                                                                                                                                                                                        |
|                                                  | C5.007 | Stength of odour in the treated waste water                                               | high, medium, low                                                                                                                                                                                                                                                      |
|                                                  | C6.001 | Solid Waste produced                                                                      | Solid waste types produced by operation at the plant.                                                                                                                                                                                                                  |
|                                                  | C6.002 | Solid waste sustainable management plan                                                   | Is there a waste management programme in place that takes into consideration reuse and/or recycling of solid waste, and/or plans to reduce waste or eliminate it, e.g. by changing inputs ?                                                                            |
| MANAGEMENT D2                                    | D0.001 | Number of operators                                                                       |                                                                                                                                                                                                                                                                        |
|                                                  | D0.002 | Shift length                                                                              | How many hours do the operators work in a normal shift?                                                                                                                                                                                                                |
| Staff D0                                         | D0.003 | Employee/inhabitant ratio                                                                 | Number of employees per 1,000 inhabitants served by the plant.                                                                                                                                                                                                         |
| Management D1                                    | D1.001 | Existance Operation manual                                                                | Does a clear, up to date operations manual exist on site, and available to all people operating the plant?                                                                                                                                                             |
|                                                  | D1.002 | Regularity of maintenance                                                                 |                                                                                                                                                                                                                                                                        |
| Capacities D2                                    | D2.001 | Capacity sufficiency                                                                      | Does all the personnel involved have the knowledge and skills they need to have?                                                                                                                                                                                       |
|                                                  | D2.002 | Capacity needs identified                                                                 | What skills or knowledge are needed by plant operators and other personnel directly in contact with the facility? Make a precise list relating stakeholders with capacity needs.                                                                                       |

|                                 |        |                                                                                                         |                                                                                                                                                                                          |
|---------------------------------|--------|---------------------------------------------------------------------------------------------------------|------------------------------------------------------------------------------------------------------------------------------------------------------------------------------------------|
| Compliance and certification D3 | D2.003 | Accessible Sampling and processing equipment                                                            | Does the plant have its own equipment or easy and hassle-free access to sampling and analysis to monitor wastewater, treated water and by-products quality?                              |
|                                 | D3.001 | Discharge standards compliance                                                                          | Percent of time that the plant's outflow complies with applicable regulations. State which regulations are being considered                                                              |
|                                 | D3.002 | Analysis frequency compliance                                                                           | Ratio of the number of effluent samplings per month and number of effluent sampling per month required by law of wastewater treatment policy (as proposed by Popovic & Kraslawski (2018) |
|                                 | D3.003 | Certification                                                                                           | Does the plant have some quality certification (ISO, or other national/international standards)                                                                                          |
| RISK E1                         | E0.001 | Has a health risk assessment related to waste water been performed at the site?                         |                                                                                                                                                                                          |
| Health E0                       | E0.002 | Are health risks being managed?                                                                         |                                                                                                                                                                                          |
|                                 | E0.003 | Do the operators have the necessary health and safety equipment?                                        |                                                                                                                                                                                          |
|                                 | E1.001 | Has a natural hazard risk assessment been performed at the facility?                                    |                                                                                                                                                                                          |
| Other hazards E1                | E1.002 | Are natural hazard risks being managed?                                                                 |                                                                                                                                                                                          |
|                                 | E1.003 | Has an environmental impact study relating wastewater with ecosystem health been performed at the site? |                                                                                                                                                                                          |
|                                 | E1.004 | What efforts are being made to reduce or manage environmental impacts?                                  |                                                                                                                                                                                          |
|                                 | E1.005 | Presence or risk of groundwater pollution                                                               |                                                                                                                                                                                          |
|                                 | E1.006 | Presence or risk of surface water pollution                                                             |                                                                                                                                                                                          |

#### DATASET I.02 - TECHNICAL-ENVIRONMENTAL BASELINE - MUNICIPAL Scale

| data items   |         | 31                                                                                                                  |                                                                                                                                                                                                     |
|--------------|---------|---------------------------------------------------------------------------------------------------------------------|-----------------------------------------------------------------------------------------------------------------------------------------------------------------------------------------------------|
| Category     | ID      | Data item                                                                                                           | Item description                                                                                                                                                                                    |
| GENERAL A    | I.02... |                                                                                                                     |                                                                                                                                                                                                     |
|              | A0.001  | Total number of connections to sewerage system                                                                      |                                                                                                                                                                                                     |
|              | A0.002  | Total population connected to sewerage system                                                                       |                                                                                                                                                                                                     |
| INPUTS B     | B0.001  | Total Estimated Municipal Water Demand                                                                              | Calculation of the theoretical water demand, according to the total population x an average endowment. Specify what endowment was used to estimate (WHO, local regulation, etc).                    |
|              | B.002   | Total Municipal Water Supply                                                                                        | Volume "produced" by the municipal water facility, i.e. volume pumped into the water system.                                                                                                        |
|              | B.003   | Supply per source                                                                                                   | Where does the municipality get its water from? State proportions if data is available                                                                                                              |
|              | B.004   | Estimated yearly water availability per capita                                                                      | Water balance calculations                                                                                                                                                                          |
|              | B.005   | Water consumption per sector                                                                                        | When possible, identify water demand proportions by different user groups within the municipality. Modify or add other user groups if necessary.                                                    |
|              |         |                                                                                                                     |                                                                                                                                                                                                     |
| OUTPUTS C    | C0.001  | Total Waste Water Production (TWW)                                                                                  | Total Waste water produced in the municipality in the reporting year                                                                                                                                |
|              | C0.002  | Wastewater types                                                                                                    | The answer to this data item is a list identifying different types of waste water, (domestic, agricultural run off, industrial, etc).                                                               |
|              | C0.003  | Wastewater composition (fractions)                                                                                  | Identify the different proportions that each consumer type contributes to the total waste water produced (TWWF) in the municipality: domestic, rain, urban runoff, agricultural runoff, etc.        |
|              | C1.001  | Proportion of wastewater safely treated                                                                             | WHO proposes this indicator and a methodology to measure it. It indicator 6.3.1 of the SDG 6.                                                                                                       |
|              | C1.002  | Proportion of TWW going to treatment at studied plant                                                               | <a href="http://www.who.int/water_sanitation_health/monitoring/coverage/stepbystep-631-20161021.pdf">http://www.who.int/water_sanitation_health/monitoring/coverage/stepbystep-631-20161021.pdf</a> |
|              | C1.003  | Proportion of TWW going to treatment at other plant(s)                                                              |                                                                                                                                                                                                     |
|              | C1.004  | Name, location and process of other plants within the municipality                                                  |                                                                                                                                                                                                     |
|              | C1.005  | Proportion of TWW going to unsafe or inefficient disposal within the municipality                                   |                                                                                                                                                                                                     |
|              | C1.006  | Proportion of TWW going to untreated release within the municipality                                                |                                                                                                                                                                                                     |
|              | C1.007  | Proportion of TWW being exported to other regions (municipalities, microwatersheds or watersheds)                   |                                                                                                                                                                                                     |
|              | C1.008  | Proportion of population using open defecation                                                                      |                                                                                                                                                                                                     |
| MANAGEMENT D | D0.001  | Number of employees in the wastewater management sector                                                             |                                                                                                                                                                                                     |
|              | D0.002  | Employee/inhabitant ratio                                                                                           | Number of employees per 1,000 inhabitants served by the plant.                                                                                                                                      |
|              | D1.001  | Regularity of maintenance                                                                                           |                                                                                                                                                                                                     |
|              | D2.001  | Capacity sufficiency                                                                                                | Does the personnel involved in wastewater management have the knowledge and skills they need to have?                                                                                               |
|              | D2.002  | Capacity needs identified                                                                                           | What skills or knowledge are needed by plant operators and other personnel directly in contact with the facility?                                                                                   |
|              |         |                                                                                                                     | Make a precise list relating stakeholders with capacity needs.                                                                                                                                      |
|              | D2.003  | Accessible Sampling and processing equipment                                                                        | Does the municipality have its own equipment or easy and hassle-free access to sampling and analysis to monitor wastewater, treated water and by-products quality?                                  |
|              | D3.001  | Certification                                                                                                       | Does the municipal wastewater management system have some quality certification (ISO, or others)?                                                                                                   |
| RISK E       | E0.001  | Has a health risk assessment related to wastewater been performed at the municipal scale                            |                                                                                                                                                                                                     |
|              | E0.002  | Are health risks related to the wastewater system being managed at the municipal scale?                             |                                                                                                                                                                                                     |
|              | E1.001  | Has a natural disasters risk assessment been performed for the wastewater management system at the municipal scale? |                                                                                                                                                                                                     |
|              | E1.002  | Are natural hazard risks to the municipal wastewater management system being managed?                               |                                                                                                                                                                                                     |
|              | E2.001  | Has an environmental impact study relating wastewater with ecosystem health been performed at the municipal scale   |                                                                                                                                                                                                     |
|              | E2.002  | Are efforts being made to reduce or manage environmental impacts?                                                   |                                                                                                                                                                                                     |
|              |         |                                                                                                                     |                                                                                                                                                                                                     |

#### DATASET I.03 - TECHNICAL-ENVIRONMENTAL BASELINE - Subcatchment Scale

| data items            |         | 70                                          |                                                                                                          |
|-----------------------|---------|---------------------------------------------|----------------------------------------------------------------------------------------------------------|
| Category              | ID      | Data item                                   | Item description                                                                                         |
| ECOLOGICAL DYNAMICS A | I.03... | (indicator)                                 |                                                                                                          |
|                       | A0.001  | Average Yearly Discharge regime             | Water volume discharged by the river or main water course in the sub-catchment into receiving water body |
|                       | A0.002  | Mean yearly Water resources availability    | Water resources available to humans under current infrastructural conditions (wells, dams, etc)          |
|                       | A0.003  | Mean annual water volume from springs       | Proportion of the subcatchment's yearly discharge volume coming from springs                             |
|                       | A0.004  | Mean annual water volume from run off       | Proportion of the subcatchment's yearly discharge volume coming from rain run-off                        |
|                       | A0.005  | Mean annual volume raw waste water          | Proportion of the subcatchment's yearly discharge volume coming from raw wastewater                      |
|                       | A0.006  | Mean annual volume from treated waste water | Proportion of the subcatchment's yearly discharge volume coming from treated water                       |

|                     |        |                                                                                                                           |                                                                                                                                                                  |
|---------------------|--------|---------------------------------------------------------------------------------------------------------------------------|------------------------------------------------------------------------------------------------------------------------------------------------------------------|
| Resources health A1 | A1.001 | Level of deforestation upstream                                                                                           | Upstream from WWTP                                                                                                                                               |
|                     | A1.002 | Level of soil erosion upstream                                                                                            | Upstream from WWTP                                                                                                                                               |
|                     | A1.003 | Identified factors affecting river water quality upstream                                                                 | Other than the WWTP. From literature and/or visual surveillance and interviews on field.                                                                         |
| WATER QUALITY B     | B0.001 | Temperature                                                                                                               | Quality of stream/river before contact with discharge from the treatment plant                                                                                   |
|                     | B0.002 | BOD                                                                                                                       |                                                                                                                                                                  |
|                     | B0.003 | COD                                                                                                                       |                                                                                                                                                                  |
|                     | B0.004 | Total Nitrogen                                                                                                            |                                                                                                                                                                  |
|                     | B0.005 | Ammonium                                                                                                                  |                                                                                                                                                                  |
|                     | B0.006 | Nitrates                                                                                                                  |                                                                                                                                                                  |
|                     | B0.007 | Total Phosphorus                                                                                                          |                                                                                                                                                                  |
|                     | B0.008 | K                                                                                                                         |                                                                                                                                                                  |
|                     | B0.009 | Ca                                                                                                                        |                                                                                                                                                                  |
|                     | B0.010 | Mg                                                                                                                        |                                                                                                                                                                  |
|                     | B0.011 | Na                                                                                                                        |                                                                                                                                                                  |
|                     | B0.012 | SAR                                                                                                                       |                                                                                                                                                                  |
|                     | B0.013 | Electric conductivity                                                                                                     |                                                                                                                                                                  |
|                     | B0.014 | Fecal coliforms                                                                                                           |                                                                                                                                                                  |
|                     | B0.015 | E.Coli                                                                                                                    |                                                                                                                                                                  |
|                     | B0.016 | Helminths                                                                                                                 |                                                                                                                                                                  |
|                     | B0.017 | Dissolved organic Carbon (DOC)                                                                                            |                                                                                                                                                                  |
|                     | B0.018 | Organic Matter                                                                                                            |                                                                                                                                                                  |
|                     | B0.019 | Organic acids                                                                                                             |                                                                                                                                                                  |
|                     | B0.020 | TSS                                                                                                                       |                                                                                                                                                                  |
|                     | B0.021 | Turbidity                                                                                                                 |                                                                                                                                                                  |
|                     | B0.022 | pH                                                                                                                        |                                                                                                                                                                  |
|                     | B0.023 | Al                                                                                                                        |                                                                                                                                                                  |
|                     | B0.024 | As                                                                                                                        |                                                                                                                                                                  |
|                     | B0.025 | Cd                                                                                                                        |                                                                                                                                                                  |
|                     | B0.026 | Co                                                                                                                        |                                                                                                                                                                  |
|                     | B0.027 | Cr                                                                                                                        |                                                                                                                                                                  |
|                     | B0.028 | Cu                                                                                                                        |                                                                                                                                                                  |
|                     | B0.029 | Fe                                                                                                                        |                                                                                                                                                                  |
|                     | B0.030 | Mn                                                                                                                        |                                                                                                                                                                  |
|                     | B0.031 | Ni                                                                                                                        |                                                                                                                                                                  |
|                     | B0.032 | Ti                                                                                                                        |                                                                                                                                                                  |
|                     | B0.033 | Zn                                                                                                                        |                                                                                                                                                                  |
|                     | B0.034 | Hg                                                                                                                        |                                                                                                                                                                  |
|                     | B0.035 | Pb                                                                                                                        |                                                                                                                                                                  |
|                     | B0.036 | Se                                                                                                                        |                                                                                                                                                                  |
|                     | B0.037 | B                                                                                                                         |                                                                                                                                                                  |
|                     | B0.038 | Mo                                                                                                                        |                                                                                                                                                                  |
|                     | B0.039 | Residual chlorine                                                                                                         |                                                                                                                                                                  |
|                     | B0.040 | Microplastics                                                                                                             |                                                                                                                                                                  |
|                     | B0.041 | AOX                                                                                                                       |                                                                                                                                                                  |
|                     | B0.042 | B(a)P                                                                                                                     |                                                                                                                                                                  |
|                     | B0.043 | PCB                                                                                                                       |                                                                                                                                                                  |
|                     | B0.044 | PCDD                                                                                                                      |                                                                                                                                                                  |
|                     | B0.045 | PCDF                                                                                                                      |                                                                                                                                                                  |
|                     | B0.046 | PFC                                                                                                                       |                                                                                                                                                                  |
|                     | B0.047 | dI-PCB                                                                                                                    |                                                                                                                                                                  |
| WASTEWATER C        | C0.001 | Number of waste water treatment plants                                                                                    | How many WWTP exist within the subcatchment area                                                                                                                 |
|                     | C0.002 | Total waste water produced                                                                                                |                                                                                                                                                                  |
|                     | C0.003 | Proportion of wastewater safely treated                                                                                   |                                                                                                                                                                  |
| MANAGEMENT D        | D0.001 | Number of non municipal staff employed in water resources management at the subcatchment scale                            | Number of staff hired by public institutions other than the municipality , appointed especially for the subcatchment scale .                                     |
|                     | D0.002 | Employee ratio                                                                                                            | Number of employees in wastewater management sector per 10,000 inhabitants in the subcatchment.                                                                  |
|                     | D1.001 | River water quality monitoring frequency                                                                                  |                                                                                                                                                                  |
|                     | D2.001 | Capacity sufficiency                                                                                                      | Does the personnel involved in wastewater management at this scale have the knowledge and skills they need to have?                                              |
|                     | D2.002 | Capacity needs identified                                                                                                 | What skills or knowledge are needed by personnel operating the WWMS at this scale? Make a precise list relating stakeholders with capacity needs.                |
|                     | D2.003 | Accessible Sampling and processing equipment                                                                              | Does the authority in charge of sub-catchment management have its own equipment or easy and hasslefree access to sampling and analysis to monitor water quality? |
|                     | D3.001 | Certification                                                                                                             | Has the administration facility received certification (of procedures, quality standards, etc)?                                                                  |
| RISK E              | E0.001 | Has a health risk assessment related to wastewater been performed at the subcatchment scale                               |                                                                                                                                                                  |
|                     | E0.002 | Are health risks related to the wastewater system being managed at the subcatchment scale?                                |                                                                                                                                                                  |
|                     | E2.001 | Has an environmental impact study relating wastewater with ecosystem health been performed at the municipal scale         |                                                                                                                                                                  |
|                     | E2.001 | Are efforts being made to reduce or manage environmental impacts of the wastewater management system on the subcatchment? |                                                                                                                                                                  |

DATASET I.04 - TECHNICAL-ENVIRONMENTAL BASELINE - Watershed Scale

| data items            |         | 68                                         |                                                                                                 |
|-----------------------|---------|--------------------------------------------|-------------------------------------------------------------------------------------------------|
| Category              | ID      | Data item                                  | Item description                                                                                |
|                       | I.04... |                                            |                                                                                                 |
| ECOLOGICAL DYNAMICS A | A0.001  | Average Yearly Discharge regime            |                                                                                                 |
| Hydrology A0          | A0.002  | Mean yearly Water resources availability   | Water resources available to humans under current infrastructural conditions (wells, dams, etc) |
| Resources health A1   | A1.001  | Degree of deforestation                    |                                                                                                 |
|                       | A1.002  | Degree of soil erosion upstream            |                                                                                                 |
|                       | A1.003  | Identified factors affecting water quality |                                                                                                 |

|                                                    |               |                                                                                                                                    |                                                                                                                                                                  |
|----------------------------------------------------|---------------|------------------------------------------------------------------------------------------------------------------------------------|------------------------------------------------------------------------------------------------------------------------------------------------------------------|
|                                                    | A1.004        | Main waterbody eutrophication                                                                                                      | low, medium, high                                                                                                                                                |
| WATER QUALITY B                                    | B0.001        | Temperature                                                                                                                        |                                                                                                                                                                  |
|                                                    | B0.002        | BOD                                                                                                                                |                                                                                                                                                                  |
|                                                    | B0.003        | COD                                                                                                                                |                                                                                                                                                                  |
|                                                    | B0.004        | Total Nitrogen                                                                                                                     |                                                                                                                                                                  |
|                                                    | B0.005        | Ammonium                                                                                                                           |                                                                                                                                                                  |
|                                                    | B0.006        | Nitrates                                                                                                                           |                                                                                                                                                                  |
|                                                    | B0.007        | Total Phosphorus                                                                                                                   |                                                                                                                                                                  |
|                                                    | B0.008        | K                                                                                                                                  |                                                                                                                                                                  |
|                                                    | B0.009        | Ca                                                                                                                                 |                                                                                                                                                                  |
|                                                    | B0.010        | Mg                                                                                                                                 |                                                                                                                                                                  |
|                                                    | B0.011        | Na                                                                                                                                 |                                                                                                                                                                  |
|                                                    | B0.012        | SAR                                                                                                                                |                                                                                                                                                                  |
|                                                    | B0.013        | Electric conductivity                                                                                                              |                                                                                                                                                                  |
|                                                    | B0.014        | Faecal coliforms                                                                                                                   |                                                                                                                                                                  |
|                                                    | B0.015        | E.Coli                                                                                                                             |                                                                                                                                                                  |
|                                                    | B0.016        | Helminths                                                                                                                          |                                                                                                                                                                  |
|                                                    | B0.017        | Dissolved organic Carbon (DOC)                                                                                                     |                                                                                                                                                                  |
|                                                    | B0.018        | Organic Matter                                                                                                                     |                                                                                                                                                                  |
|                                                    | B0.019        | Organic acids                                                                                                                      |                                                                                                                                                                  |
|                                                    | B0.020        | TSS                                                                                                                                |                                                                                                                                                                  |
|                                                    | B0.021        | Turbidity                                                                                                                          |                                                                                                                                                                  |
|                                                    | B0.022        | pH                                                                                                                                 |                                                                                                                                                                  |
|                                                    | B0.023        | Al                                                                                                                                 |                                                                                                                                                                  |
|                                                    | B0.024        | As                                                                                                                                 |                                                                                                                                                                  |
|                                                    | B0.025        | Cd                                                                                                                                 |                                                                                                                                                                  |
|                                                    | B0.026        | Co                                                                                                                                 |                                                                                                                                                                  |
|                                                    | B0.027        | Cr                                                                                                                                 |                                                                                                                                                                  |
|                                                    | B0.028        | Cu                                                                                                                                 |                                                                                                                                                                  |
|                                                    | B0.029        | Fe                                                                                                                                 |                                                                                                                                                                  |
|                                                    | B0.030        | Mn                                                                                                                                 |                                                                                                                                                                  |
|                                                    | B0.031        | Ni                                                                                                                                 |                                                                                                                                                                  |
|                                                    | B0.032        | Ti                                                                                                                                 |                                                                                                                                                                  |
|                                                    | B0.033        | Zn                                                                                                                                 |                                                                                                                                                                  |
|                                                    | B0.034        | Hg                                                                                                                                 |                                                                                                                                                                  |
|                                                    | B0.035        | Pb                                                                                                                                 |                                                                                                                                                                  |
|                                                    | B0.036        | Se                                                                                                                                 |                                                                                                                                                                  |
|                                                    | B0.037        | B                                                                                                                                  |                                                                                                                                                                  |
|                                                    | B0.038        | Mo                                                                                                                                 |                                                                                                                                                                  |
|                                                    | B0.039        | Residual chlorine                                                                                                                  |                                                                                                                                                                  |
|                                                    | B0.040        | Microplastics                                                                                                                      |                                                                                                                                                                  |
|                                                    | B0.041        | AOX                                                                                                                                |                                                                                                                                                                  |
|                                                    | B0.042        | B(a)P                                                                                                                              |                                                                                                                                                                  |
|                                                    | B0.043        | PCB                                                                                                                                |                                                                                                                                                                  |
|                                                    | B0.044        | PCDD                                                                                                                               |                                                                                                                                                                  |
|                                                    | B0.045        | PCDF                                                                                                                               |                                                                                                                                                                  |
|                                                    | B0.046        | PFC                                                                                                                                |                                                                                                                                                                  |
|                                                    | B0.047        | dI-PCB                                                                                                                             |                                                                                                                                                                  |
| WASTE WATER C                                      | C0.001        | Number of waste water treatment plants                                                                                             | How many WWTP exist within the watershed area                                                                                                                    |
|                                                    | C0.002        | Total waste water produced                                                                                                         |                                                                                                                                                                  |
|                                                    | C0.003        | Proportion of wastewater safely treated                                                                                            |                                                                                                                                                                  |
| MANAGEMENT D                                       | D0.001        | Number of non municipal staff employed in water resources management at the watershed scale                                        | Number of staff hired by public institutions other than the municipality , appointed especially for the watershed scale.                                         |
| Staff D0                                           | D0.002        | Employee ratio                                                                                                                     | Number of employees per 10,000 inhabitants in the watershed                                                                                                      |
|                                                    | D1.001        | Uses of main waterbody water                                                                                                       | What uses do different population groups give to the water in the main water body understudy at this scale?                                                      |
| Main water body water quality monitoring frequency |               |                                                                                                                                    |                                                                                                                                                                  |
|                                                    | Capacities D2 | D2.001                                                                                                                             | Capacity sufficiency                                                                                                                                             |
| D2.002                                             |               | Capacity needs identified                                                                                                          | What skills or knowledge are needed by personnel involved in wastewater management? Make a precise list relating stakeholders with capacity needs.               |
| Compliance and certification D3                    | D2.003        | Accessible Sampling and processing equipment                                                                                       | Does the authority in charge of monitoring the watershed have its own equipment or easy and hasselfree access to sampling and analysis to monitor water quality? |
|                                                    | D3.001        | Water quality monitoring frequency compliance                                                                                      |                                                                                                                                                                  |
|                                                    | D3.002        | Certification                                                                                                                      | Has the watershed authority received certification (of procedures, quality standards, etc)?                                                                      |
| RISK E                                             | E0.001        | Has a health risk assessment related to wastewater been performed at the watershed scale                                           |                                                                                                                                                                  |
|                                                    | E0.002        | Are health risks related to the wastewater system being managed at the watershed scale?                                            |                                                                                                                                                                  |
|                                                    | E2.001        | Has an environmental impact study relating wastewater with ecosystem health been performed at the munatershedipal scale            |                                                                                                                                                                  |
|                                                    | E2.001        | Are efforts being made to reduce or manage environmental impacts of the wastewater management system on the watershed's resources? |                                                                                                                                                                  |
| Health E0                                          |               |                                                                                                                                    |                                                                                                                                                                  |
| Environmental Impact E2                            |               |                                                                                                                                    |                                                                                                                                                                  |

## SludgeTec extended dataset framework - IIA- SOCIAL ECONOMIC DATA

Total data items 62

### DATASET II.01 - SOCIAL/ECONOMIC BASELINE - WWTP Scale

Data items 26

| Category     | ID       | Data item                                            | Item description                                                      |
|--------------|----------|------------------------------------------------------|-----------------------------------------------------------------------|
|              | II.01... |                                                      |                                                                       |
| ECONOMICAL A | A0.001   | Total Running costs                                  | Total costs of yearly operation, including all areas.                 |
| Costs A0     | A0.002   | Cost per m3 of water treated                         | Cost of producing one cubic meter of treated water                    |
|              | A0.003   | Cost per inhabitant served                           |                                                                       |
|              | A0.004   | Proportion of costs: energy                          |                                                                       |
|              | A0.005   | Proportion of costs: raw materials                   |                                                                       |
|              | A0.006   | Proportion of costs: maintenance and repairs         |                                                                       |
|              | A0.007   | Proportion of costs: quality testing and lab work    |                                                                       |
|              | A0.008   | Proportion of costs: salaries and other labour costs |                                                                       |
|              | A0.009   | Proportion of costs: training, capacity building     |                                                                       |
|              | A0.010   | Proportion of costs: solid waste management          |                                                                       |
| Income A1    | A1.001   | Total plant income                                   | Total income of the plant yearly. Specify currency used under 'units' |
|              | A1.002   | Real financial availability per inhabitant served    |                                                                       |
|              | A1.003   | Budget deficit                                       |                                                                       |
|              | A1.004   | Current financing sources                            |                                                                       |
|              | A1.005   | Alternative financing sources identified             |                                                                       |
|              | A1.006   | Valorisation of by products                          | Are products of the plant being valbrised (sold, recycled, etc)       |

### DATASET II.02 - SOCIO ECONOMIC BASELINE - Municipal Scale

Data items 56

|                              |        |                                                                                                     |                                                                                                                                                                     |
|------------------------------|--------|-----------------------------------------------------------------------------------------------------|---------------------------------------------------------------------------------------------------------------------------------------------------------------------|
| ECONOMIC A                   | A0.001 | Financial requirements of wastewater sector at the municipal scale                                  | Total budgetary requirements for the wastewater sector in the municipality.                                                                                         |
| Costs A0                     | A0.002 | Cost per m3 of water treated                                                                        | For the municipality                                                                                                                                                |
|                              | A0.003 | Cost per inhabitant served                                                                          | For the municipality                                                                                                                                                |
| Income A1                    | A1.001 | Total real budget                                                                                   | Total budget available to the municipality to deal with sanitation and wastewater management issues. A similar indicator is proposed in Quadros et al., 2010.       |
|                              | A1.002 | Ratio Investment per inhabitant                                                                     | How much does the municipality invest in the WW management system per inhabitant?                                                                                   |
|                              | A1.003 | Percentage of municipal budget destined to wastewater management                                    |                                                                                                                                                                     |
|                              | A1.004 | Budgetary deficit                                                                                   |                                                                                                                                                                     |
|                              | A1.005 | Cost of connection to water system                                                                  | To users                                                                                                                                                            |
|                              | A1.006 | Cost of connection to sewerage system                                                               | To users                                                                                                                                                            |
| Finance management A2        | A2.001 | Financial plan existing                                                                             | Does the wastewater sector in the municipality have a financial plan?                                                                                               |
|                              | A2.002 | Current financing sources                                                                           |                                                                                                                                                                     |
|                              | A2.003 | Alternative financing sources identified                                                            |                                                                                                                                                                     |
| SOCIAL B                     | B0.001 | Institutional Planning: Existence of an institutional plan for ww management at the municipal scale |                                                                                                                                                                     |
| Governance and Management B0 | B0.002 | Clear governance and management structures                                                          | Is the governance and management structure clear to all stakeholders involved? Are responsibilities clear?                                                          |
|                              | B0.003 | Cross sectoral integration                                                                          | is wastewater management integrated with other sectors at the operative or planning scale? i.e coordination with waste sector, with water sector, with agriculture. |
|                              | B0.004 | Policy concurrence                                                                                  | Are policies overlapping (e.g. two different policies regulate one same resource or process, so as to create confusion or double-regulating)                        |
|                              | B0.005 | Managerial communication                                                                            | Is there a direct or uncomplicated communication channel for operators and actors on the ground to inform and influence decision makers?                            |

### DATASET II.03 - SOCIO ECONOMIC BASELINE - Subcatchment Scale

Data items 7

|                              |        |                                                                                                              |                                                                                                                                                                     |
|------------------------------|--------|--------------------------------------------------------------------------------------------------------------|---------------------------------------------------------------------------------------------------------------------------------------------------------------------|
| SOCIAL B                     | B0.001 | Is there a governance administrative body for the watershed?                                                 |                                                                                                                                                                     |
| Governance and Management B0 | B0.002 | Institutional planning: Existence of an integrated water resources management plan for the watershed?        |                                                                                                                                                                     |
|                              | B0.003 | Institutional PPlanning: Existence of an institutional plan for wastewater management at the watershed scale |                                                                                                                                                                     |
|                              | B0.004 | Clear management structures                                                                                  | Is the governance and management structure clear to all stakeholders involved at this scale? Are responsibilities clear?                                            |
|                              | B0.005 | Cross sectoral integration                                                                                   | is wastewater management integrated with other sectors at the operative or planning scale? i.e coordination with waste sector, with water sector, with agriculture. |
|                              | B0.006 | Policy concurrence                                                                                           | Are policies overlapping (e.g. two different policies regulate one same resource or process, so as to create confusion or double-regulating)                        |
|                              | B0.007 | Managerial communication                                                                                     | Is there a direct or uncomplicated communication channel for operators and actors on the ground to inform and influence decision makers?                            |

### DATASET II.04 - SOCIO ECONOMIC BASELINE - Watershed Scale

Data items 12

|                              |        |                                                                                                             |                                                                                                                                                                     |
|------------------------------|--------|-------------------------------------------------------------------------------------------------------------|---------------------------------------------------------------------------------------------------------------------------------------------------------------------|
| ECONOMIC A                   | A0.001 | Total costs for operating water/wastewater facilities/management system at the watershed scale              | For running the watershed governance/administration facility.                                                                                                       |
|                              | A0.002 | Budget destined to the watershed administration facility                                                    | If a watershed management facility is existing. See data item B0.001                                                                                                |
|                              | A0.003 | Budget deficit?                                                                                             |                                                                                                                                                                     |
|                              | A0.004 | Current financing sources                                                                                   |                                                                                                                                                                     |
|                              | A0.005 | Alternative financing sources identified                                                                    |                                                                                                                                                                     |
| SOCIAL B                     | B0.001 | Is there a governance administrative body for the watershed/ecoregion                                       |                                                                                                                                                                     |
| Governance and Management B0 | B0.002 | Institutional planning: Existence of an integrated water resources management plan for the watershed?       |                                                                                                                                                                     |
|                              | B0.003 | Institutional Planning: Existence of an institutional plan for wastewater management at the watershed scale |                                                                                                                                                                     |
|                              | B0.004 | Clear management structures                                                                                 |                                                                                                                                                                     |
|                              | B0.005 | Cross sectoral integration                                                                                  | is wastewater management integrated with other sectors at the operative or planning scale? i.e coordination with waste sector, with water sector, with agriculture. |
|                              | B0.006 | Policy concurrence                                                                                          | Are policies overlapping in a way as to create unclearness in respos                                                                                                |
|                              | B0.007 | Managerial communication                                                                                    | Is there a direct or uncomplicated communication channel for operators and actors on the ground to inform and influence decision makers?                            |



SludgeTec extended dataset framework - IIB - MULTISCALE SOCIAL DATA

|                     |        |                                                                      |
|---------------------|--------|----------------------------------------------------------------------|
| Data items          | 10     |                                                                      |
| SOCIAL ACCEPTANCE A | A0.001 | Personal interest in wastewater management problems                  |
|                     | A0.002 | Personal awareness of wastewater management problems                 |
|                     | A0.003 | Willingness to be informed about the wastewater management problems  |
|                     | A0.004 | Accessibility to information                                         |
|                     | A0.005 | Possibilities for providing a recommendation                         |
|                     | A0.006 | Recommendations are taken into account?                              |
|                     | A0.007 | Willingness to participate in decision-making                        |
|                     | A0.008 | Participative decision-making                                        |
|                     | A0.009 | Personal acceptance of the current wastewater management             |
|                     | A0.010 | Perception of social acceptance of the current wastewater management |
